# Supplementary material for: Superior thermoelectric properties of bulk and monolayer fullerene networks
Source: Royal Society of Chemistry journal article supplement (doi:10.1039/d2ta08537b), 2023-01-01
Supplement: d2ta08537b1.pdf [file d2ta08537b1.pdf]

Supporting Information

## Superior thermoelectric properties of bulk and monolayer fullerene networks

Wenwen Li, Rui Yang, Mengtao Sun\*

School of Mathematics and Physics, Beijing Advanced Innovation Center for Materials Genome Engineering, University of Science and Technology Beijing, Beijing 100083, China

\*Corresponding author. Email: mengtaosun@ustb.edu.cn (M. Sun).

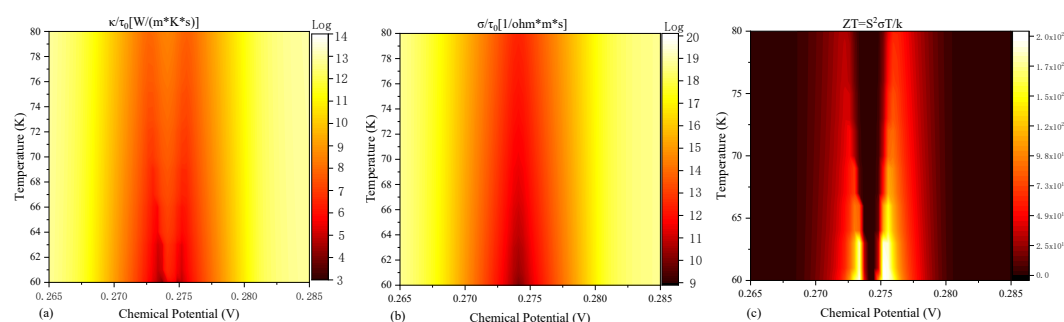

Figure S1. (a)The thermal conductance, (b) conductance and (c)ZT of qHP-3D fullerene materials.

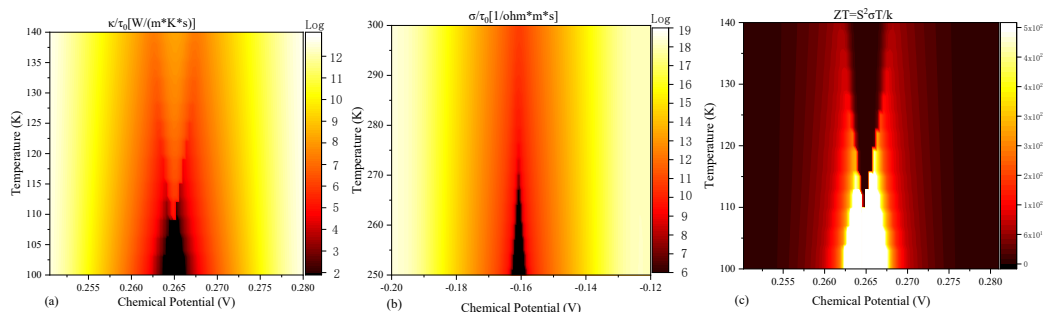

Figure S2. (a)The thermal conductance, (b) conductance and (c)ZT of qTP-3D fullerene materials.

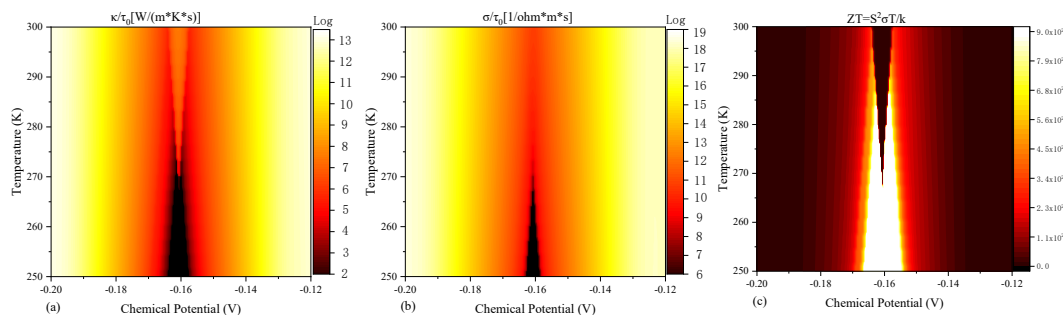

Figure S3. (a)The thermal conductance, (b) conductance and (c)ZT of qHP-2D fullerene materials.

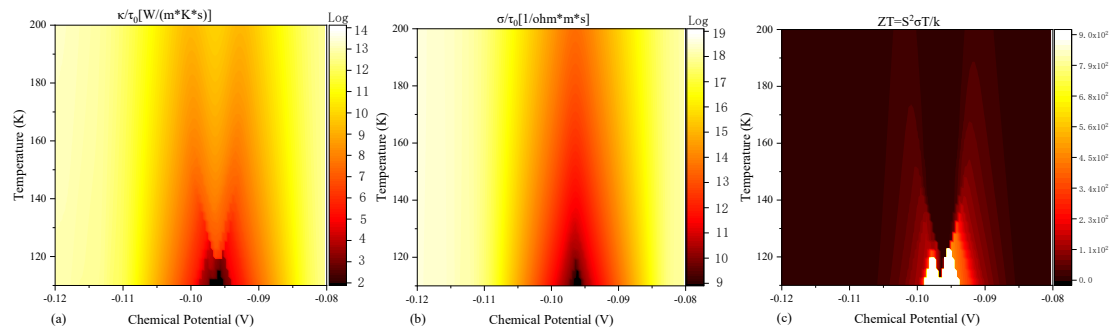

Figure S4.(a)The thermal conductance, (b) conductance and (c)ZT of qTP- $\alpha$ -2D fullerene materials.

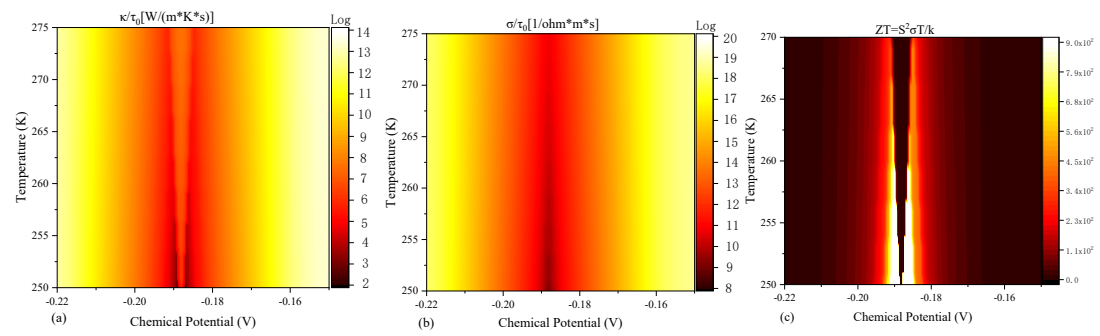

Figure S5.(a)The thermal conductance, (b) conductance and (c)ZT of qTP- $\beta$ -2D fullerene materials.
